# Supplementary material for: On the Sustainability Performance of the European Union’s Economic Recovery Strategy – A Case Study with Lessons for Policymakers
Source: Research Square preprint supplement (doi:10.21203/rs.3.rs-583734/v3), 2021-08-05
Supplement: Supplementary file 1 [file c94aeaac5b3ef321f4bf50c2.xlsx]

## Sheet: Mapping
Sequential Number	Component Reference	Reform / Investment	Measure -Short title	Cost	Transf. 1 - Education, Gender, Inequality	Transf. 2 - Health, Wellbeing, Demography	Transf. 3 - Energy Decar-bonisation & Sustainable Industry	Transf. 4 - Sustainable Food, Land, Water, Oceans	Transf. 5 - Sustainable Cities and Communities	Transf. 6 - Digital Revo-lution for Sustainable Development	check	Goal 1-No Poverty	Goal 2-Zero Hunger	Goal 3-Good Health & Well Being	Goal 4-Quality Education	Goal 5-Gender Equality	Goal 6-Clean Water & Sanitation	Goal 7-Affordable & Clean Energy	Goal 8-Decent Work & Economic Growth	Goal 9-Industry, Innovation & Infrastructure	Goal 10-Reduced Inequalities	Goal 11-Sustainable Cities & Communities	Goal 12-Responsible Consumption & Production	Goal 13-Climate Action	Goal 14-Life Below Water	Goal 15-Life On Land	Goal 16-Peace Justice & Strong Institutions	Goal 17-Partnerships for the Goals
1	1 - 1.1 Resilient and Effective Health System, Improved Civil Protection	Reform	Reform 1: National Centre for Clinical Documentation	4.32		1					1			1
2	1 - 1.1 Resilient and Effective Health System, Improved Civil Protection	Reform	Reform 2: Design an electronic platform for the surveillance of Nosocomical Antibiotic Consumption and Healthcare – Associated infections	5.7		1					1			1						1
4	1 - 1.1 Resilient and Effective Health System, Improved Civil Protection	Reform	Reform 3: Gradually shifting the focus from treatment and hospitalization to prevention and management of conditions, as the system moves towards value-based reimbursement models	2.5		1					1			1
5	1 - 1.1 Resilient and Effective Health System, Improved Civil Protection	Investment	Investment 1: New facilities Blood Establishment and procurement of the latest technology attendant equipment	46.45		1					1			1
6	1 - 1.1 Resilient and Effective Health System, Improved Civil Protection	Investment	Investment 2: Cyprus Innovative Public Health ICT System (CIPHIS)	4.5		1				1	2			1						1
7	1 - 1.1 Resilient and Effective Health System, Improved Civil Protection	Investment	Investment 3: Purchase/replacement of medical equipment in public and private hospitals	3		1					1			1
8	1 - 1.1 Resilient and Effective Health System, Improved Civil Protection	Investment	Investment 4: Accreditation of public and private hospitals	0.4		1					1			1
9	1 - 1.1 Resilient and Effective Health System, Improved Civil Protection	Investment	Investment 5: Enhancement, modernization and upgrade of Cyprus State Hospitals	1.94476		1					1			1
3	1 - 1.1 Resilient and Effective Health System, Improved Civil Protection	Reform	Investment 6: Deployment of generic cross border ehealth services in Cyprus	5		1				1	2			1						1
10	1 - 1.1 Resilient and Effective Health System, Improved Civil Protection	Investment	Investment 7: Public warning system for supporting emergency operations through SMS with additional options (e.g. TV, radio, social media, apps, etc.)	0.28		1				1	2			1						1		1		1
11	2 - 2.1 Climate neutrality, Energy efficiency and renewable energy penetration	Reform	Reform 1: Green Taxation	0			1				1							1				1	1	1		1		1
12	2 - 2.1 Climate neutrality, Energy efficiency and renewable energy penetration	Reform	Reform 2: Independence of Cyprus Transmission System Operator (TSOC) from the incumbent Electricity Authority of Cyprus	0			1				1							1				1		1
13	2 - 2.1 Climate neutrality, Energy efficiency and renewable energy penetration	Reform	Reform 3: Digital One-Stop Shops to streamline RES projects permitting and to facilitate Energy Renovation in Buildings	0.5			1				1							1				1		1
14	2 - 2.1 Climate neutrality, Energy efficiency and renewable energy penetration	Reform	Reform 4: Energy Storage Regulatory Framework	0			1				1							1				1		1
15	2 - 2.1 Climate neutrality, Energy efficiency and renewable energy penetration	Investment	Investment 1: Promoting energy efficiency investments in SMEs, municipalities, communities and the wider public sector	40			1				1							1				1		1
16	2 - 2.1 Climate neutrality, Energy efficiency and renewable energy penetration	Investment	Investment 2: Promoting renewables and individual energy efficiency measures and tackling energy poverty in households with disabled people	20.5	1	1	1				3	1		1				1			1	1		1
17	2 - 2.1 Climate neutrality, Energy efficiency and renewable energy penetration	Investment	Investment 3: Encouraging the use of renewables and energy savings by local/wider public authorities as well as NGOs and facilitate the transition of local communities towards climate mitigation & adaptation	12.502			1				1							1				1		1
18	2 - 2.1 Climate neutrality, Energy efficiency and renewable energy penetration	Investment	Investment 4: Reduction of CO2 emissions in industries, businesses and organizations	20			1				1		1				1	1		1		1	1	1		1
19	2 - 2.1 Climate neutrality, Energy efficiency and renewable energy penetration	Investment	Investment 5: Energy Efficiency Upgrading of public buildings	11.45			1				1							1
20	2 - 2.1 Climate neutrality, Energy efficiency and renewable energy penetration	Investment	Investment 6: Upgrading renewable energy and smart grids testing infrastructure at the University of Cyprus	1.59096	1		1				2				1			1		1				1
21	2 - 2.1 Climate neutrality, Energy efficiency and renewable energy penetration	Investment	Investment 7: Mass installation and operation by the Distribution System Operator (DSO) of Smart Metering Infrastructure (Advanced Metering Infrastructure)	35			1				1							1						1
22	2 - 2.1 Climate neutrality, Energy efficiency and renewable energy penetration	Investment	Investment 8: Monitoring and reduction of GHG emissions in agriculture	4.4			1	1			2		1										1	1
23	2 - 2.1 Climate neutrality, Energy efficiency and renewable energy penetration	Investment	Investment 9: Forests fire protection	18.67				1			1													1		1
24	2 - 2.1 Climate neutrality, Energy efficiency and renewable energy penetration	Investment	Investment 10: Market Management System to facilitate the opening of the electricity market to competition	4.7			1				1							1						1
25	2 - 2.1 Climate neutrality, Energy efficiency and renewable energy penetration	Investment	Investment 11: Ending energy isolation-Project of Common Interest "EuroAsia Interconnector"	100			1				1							1						1
26	3 - 2.2 Sustainable transport	Reform	Reform 1: Establishment of an Intelligent Transportation System using Digital Twin technologies	4					1	1	2			1						1		1		1
27	3 - 2.2 Sustainable transport	Reform	Reform 2: Provide the regulatory framework for an interoperable and effective electric vehicle recharging infrastructure and an efficient EV recharging market;	0.2			1		1		2			1								1		1
28	3 - 2.2 Sustainable transport	Reform	Reform 3: Progressively phase out the most polluting vehicles, especially in polluted urban areas	0			1		1		2			1								1	1	1
29	3 - 2.2 Sustainable transport	Investment	Investment 1: Implementation of Sustainable Urban Mobility Projects (SUMP) and accessibility enhancing measures	31.5			1		1		2		1	1							1	1		1
30	3 - 2.2 Sustainable transport	Investment	Investment 2: Creation of electro-mobility infrastructure	6.79			1		1		2									1		1	1	1
31	3 - 2.2 Sustainable transport	Investment	Investment 3: Promote widespread use of Electric Vehicles (EVs)	48.8102			1		1		2											1	1	1
32	4 - 2.3 Smart and Sustainable Water Management	Reform	Reform 1: Water Resource Management Reform	0.74				1	1		2						1					1	1			1
33	4 - 2.3 Smart and Sustainable Water Management	Investment	Investment 1: Khoirokoitia‐Famagusta Conveyor Replacement	11.7647					1		1						1					1
34	4 - 2.3 Smart and Sustainable Water Management	Investment	Investment 2: Water Treatment Plants (WTP) Upgrade for water quality improvement	6.01704					1		1			1			1					1
35	4 - 2.3 Smart and Sustainable Water Management	Investment	Investment 3: Integrated Monitoring and Control Management System for the Water Development Department’s (WDD) infrastructure	5.96				1	1		2						1			1		1	1			1
36	4 - 2.3 Smart and Sustainable Water Management	Investment	Investment 4: Smart Water Networks Management	22.2				1	1	1	3						1			1
37	4 - 2.3 Smart and Sustainable Water Management	Investment	Investment 5: Anti-flood and water collection measures	16					1		1											1		1		1
38	4 - 2.3 Smart and Sustainable Water Management	Investment	Investment 6: Enhance water security for Nicosia and Larnaca regions	6.04861					1		1						1
39	4 - 2.3 Smart and Sustainable Water Management	Investment	Investment 7: Eastern Nicosia infrastructure for wastewater treatment’s effluent re-use.	10.95				1	1		2											1	1			1
40	4 - 2.3 Smart and Sustainable Water Management	Investment	Investment 8: Protection of the Marine Environment from Oil Pollution	8.04			1	1			2			1											1	1
41	6 - 3.1 New Growth Model and diversification of the economy	Reform	Reform 1: Move agricultural practices from the 20th century to the 21st century by investing in a national centre for excellence in agri-tech					1			1		1							1			1			1
42	6 - 3.1 New Growth Model and diversification of the economy	Reform	Reform 2: On-line, cloud-based platform for improving the trade and information symmetry in the fresh produce supply chain	0.54				1		1	2		1							1							1
43	6 - 3.1 New Growth Model and diversification of the economy	Reform	Reform 3: Genetic improvement of the Cyprus sheep and goat population	5				1			1		1													1
44	6 - 3.1 New Growth Model and diversification of the economy	Reform	Reform 4: Enhancement of Circular Economy in the Industry	15			1				1									1			1	1		1
45	6 - 3.1 New Growth Model and diversification of the economy	Reform	Reform 5: Establishment of a Coordinating Body between Central and Local Government	0			1		1		2											1	1	1			1
46	6 - 3.1 New Growth Model and diversification of the economy	Investment	Investment 1: Construction of a collaborative Marine Aquaculture Infrastructure (port and land facilities) in Pentakomo coastal area	29				1			1		1						1						1
47	6 - 3.1 New Growth Model and diversification of the economy	Investment	Investment 2: Enhancing the existing isotopic databases of Cypriot local traditional food/ drinks by developing a Block Chain platform, to ensure their identity	1				1			1		1							1			1			1	1
48	6 - 3.1 New Growth Model and diversification of the economy	Investment	Investment 3: Upskill the existing farming community and professionalise future labour force by investing in human capital		1			1			2	1			1				1		1		1			1
49	6 - 3.1 New Growth Model and diversification of the economy	Investment	Investment 4: Initiating the setup of the first Eco-Industrial Park	0.1			1	1			2								1	1
50	6 - 3.1 New Growth Model and diversification of the economy	Investment	Investment 5: Creation of a National Commercial Identity and promotion of traditional products	0.18				1			1					1			1	1		1	1
51	6 - 3.1 New Growth Model and diversification of the economy	Investment	Investment 6: Scheme for modernisation and digitalisation of enterprises engaged in manufacturing and trading of agricultural products	25			1			1	2									1			1
52	6 - 3.1 New Growth Model and diversification of the economy	Investment	Investment 7: Scheme for the Enhancement of Large Enterprises Competitiveness in the Manufacturing Sector	10			1				1								1	1
53	6 - 3.1 New Growth Model and diversification of the economy	Investment	Investment 8: Enhancing the sustainability and added value of the tourism sector	26					1		1								1
54	6 - 3.1 New Growth Model and diversification of the economy	Investment	Investment 9: Promotion of circular economy on hotel establishments	1.4			1				1				1								1
55	6 - 3.1 New Growth Model and diversification of the economy	Investment	Investment 10: Enrichment of the tourism product in rural, mountainous and remote areas	6.8	1		1		1		3										1	1
56	6 - 3.1 New Growth Model and diversification of the economy	Investment	Investment 11: Extension of Green Points National Network – Phase A and Phase B	10			1				1											1	1	1
57	6 - 3.1 New Growth Model and diversification of the economy	Investment	Investment 12: Waste Management towards Circular Economy	14.3			1	1	1		3											1	1	1
58	6 - 3.1 New Growth Model and diversification of the economy	Investment	Investment 13: Establishment of the Orounda Livestock Waste and Animal-By-Product (ABP) Management Facilities with a Biogas Production Unit	25			1	1	1		3			1				1				1	1	1
59	7 - 3.2 Enhanced Research & Innovation	Reform	Reform 1: Comprehensive national R&I Policy supported by data-driven policy tools to support the R&I Ecosystem and to enhance links between policy making and implementation		1					1	2								1	1
60	7 - 3.2 Enhanced Research & Innovation	Reform	Reform 2: Incentives to encourage and attract investments and human capital in R&I		1						1								1	1
61	7 - 3.2 Enhanced Research & Innovation	Reform	Reform 3: Introduce policies and incentives to facilitate and foster access to publicly funded research infrastructure and laboratories		1						1									1
62	7 - 3.2 Enhanced Research & Innovation	Investment	Investment 1: Setup and operate a central knowledge transfer office	3	1						1									1							1
63	7 - 3.2 Enhanced Research & Innovation	Investment	Investment 2: Innovation Funding Programs & Funding schemes for the enhancement of growth & competitiveness of startups, innovative companies and SMEs	52.0009	1						1								1	1
64	7 - 3.2 Enhanced Research & Innovation	Investment	Investment 3: Thematic research and innovation funding program on green transition	6	1		1	1			3						1	1	1	1			1	1	1	1
65	7 - 3.2 Enhanced Research & Innovation	Investment	Investment 4: Incentive scheme for the development of classified laboratories and deployment of classified communication networks in research and academic organizations including Centres of Excellence, academic institutions, research organizations as well as in companies engaged in R&I on dual use technologies	3	1		1				2									1							1
66	8 - 3.3 Business support for competitiveness	Reform	Reform 1: Facilitation of Strategic investments								0								1	1
67	8 - 3.3 Business support for competitiveness	Reform	Reform 2: Enhancing Fast-Track Business Activation Mechanism								0								1	1
68	8 - 3.3 Business support for competitiveness	Reform	Reform 3: Modernisation of the Companies Law	1.75							0								1	1
69	8 - 3.3 Business support for competitiveness	Reform	Reform 4: Design and establish a National Promotional Agency	0							0								1	1
70	8 - 3.3 Business support for competitiveness	Reform	Reform 5: Incentives to promote mergers & acquisitions								0									1
71	8 - 3.3 Business support for competitiveness	Reform	Reform 6: Strategic Investor and digitalisation of the Cyprus Stock Exchange	0.71413							0								1	1
72	8 - 3.3 Business support for competitiveness	Investment	Investment 1: Integrated Information system for the Registrar of Companies and Official Receiver	6.58							0								1	1
73	8 - 3.3 Business support for competitiveness	Investment	Investment 2: Creation of a Regulatory Sandbox to enable FinTech	0.4							0								1	1
74	8 - 3.3 Business support for competitiveness	Investment	Investment 3: Consulting services for SMEs	4							0								1		1
75	8 - 3.3 Business support for competitiveness	Investment	Investment 4: Scheme for the digital upgrade of enterprises	10						1	1								1	1
76	8 - 3.3 Business support for competitiveness	Investment	Investment 5: Support the extroversion and the openness of Cypriot firms	8.43							0								1
77	8 - 3.3 Business support for competitiveness	Investment	Investment 6: State funded equity fund	20							0								1
78	8 - 3.3 Business support for competitiveness	Investment	Investment 7: Loan subsidization for new business loans	26.96							0								1
79	9 - 3.4 Public and Local Administration Reform, Judicial reform and Anti-corruption reform	Reform	Reform 1: Enhance the administrative capacity and improve the functioning of public administration for better policy making and implementation								0																1
80	9 - 3.4 Public and Local Administration Reform, Judicial reform and Anti-corruption reform	Reform	Reform 2: Regulate flexible working arrangements in the public sector		1	1					2																1
81	9 - 3.4 Public and Local Administration Reform, Judicial reform and Anti-corruption reform	Reform	Reform 3: Introduce new framework for evaluation and selection process for filling public service vacancies and new regulations for the evaluation of employees’ performance								0																1
82	9 - 3.4 Public and Local Administration Reform, Judicial reform and Anti-corruption reform	Reform	Reform 4: Strengthen administrative capacity and transparency through the professionalization of public procurement and further digitalization of its process	5							0																1
83	9 - 3.4 Public and Local Administration Reform, Judicial reform and Anti-corruption reform	Reform	Reform 5: Enhancement of the capacity of the Law Office	1.03							0																1
84	9 - 3.4 Public and Local Administration Reform, Judicial reform and Anti-corruption reform	Reform	Reform 6: New legal framework for Local Authorities and relevant support measures	0.84							0																1
85	9 - 3.4 Public and Local Administration Reform, Judicial reform and Anti-corruption reform	Reform	Reform 7: Urban land consolidation	0.45					1		1											1					1
86	9 - 3.4 Public and Local Administration Reform, Judicial reform and Anti-corruption reform	Reform	Reform 8: Efficiency and Functionality of Justice								0																1
87	9 - 3.4 Public and Local Administration Reform, Judicial reform and Anti-corruption reform	Reform	Reform 9: Digital transformation of courts	11.17						1	1									1							1
88	9 - 3.4 Public and Local Administration Reform, Judicial reform and Anti-corruption reform	Reform	Reform 10: Setting Up Anticorruption Agency (will include Training Awareness Campaign)	5.53							0																1
89	9 - 3.4 Public and Local Administration Reform, Judicial reform and Anti-corruption reform	Investment	Investment 1: Rationalisation of the shift system through the implementation of a Roster Planning System	0.55	1						1								1
90	9 - 3.4 Public and Local Administration Reform, Judicial reform and Anti-corruption reform	Investment	Investment 2: Digitalisation of the law-making process	1.72						1	1									1							1
91	9 - 3.4 Public and Local Administration Reform, Judicial reform and Anti-corruption reform	Investment	Investment 3: Economic Policy Modelling Hub	1.39	1						1				1					1
92	9 - 3.4 Public and Local Administration Reform, Judicial reform and Anti-corruption reform	Investment	Investment 4: Enhancing e-system for issuing building permits	1.12							0									1							1
93	9 - 3.4 Public and Local Administration Reform, Judicial reform and Anti-corruption reform	Investment	Investment 5: Smart cities	35					1	1	2									1		1	1
94	9 - 3.4 Public and Local Administration Reform, Judicial reform and Anti-corruption reform	Investment	Investment 6: Regeneration and Revitalization of Nicosia Inner City	29.4941					1		1								1			1
95	9 - 3.4 Public and Local Administration Reform, Judicial reform and Anti-corruption reform	Investment	Investment 7: Training of judges court staff	0.19368							0				1												1
96	9 - 3.4 Public and Local Administration Reform, Judicial reform and Anti-corruption reform	Investment	Investmetn 8: Upgrading the infrastructure of Courts	2.5						1	1																1
97	9 - 3.4 Public and Local Administration Reform, Judicial reform and Anti-corruption reform	Investment	Investment 9: Aid Scheme for the private and public sector for certification with ISO 37000 (Anti Bribery)	2							0																1
98	10 - 3.5 Safeguarding Fiscal and Financial Stability	Reform	Reform 1: Completing the legal framework for Crisis Management for Credit Institutions								0																1
99	10 - 3.5 Safeguarding Fiscal and Financial Stability	Reform	Reform 2: Framework and Action Plan for addressing NPLs								0																1
100	10 - 3.5 Safeguarding Fiscal and Financial Stability	Reform	Reform 3: Strategy for addressing inadequacies of the property transaction system (title deeds)								0									1							1
101	10 - 3.5 Safeguarding Fiscal and Financial Stability	Reform	Reform 4: New legal framework and System of exchange of data and credit								0									1							1
102	10 - 3.5 Safeguarding Fiscal and Financial Stability	Reform	Reform 5: Action plan for the development of a liability monitoring register								0																1
103	10 - 3.5 Safeguarding Fiscal and Financial Stability	Reform	Reform 6: Enhancement of the Insolvency Framework	0.76							0																1
104	10 - 3.5 Safeguarding Fiscal and Financial Stability	Reform	Reform 7: Strategy for Combating Financial Illiteracy		1						1				1						1
105	10 - 3.5 Safeguarding Fiscal and Financial Stability	Reform	Reform 8: Enhancing supervision of Insurance and Pension Funds								0																1
106	10 - 3.5 Safeguarding Fiscal and Financial Stability	Reform	Reform 9: Improving tax collection and effectiveness of the Tax Department	32.93							0																1	1
107	10 - 3.5 Safeguarding Fiscal and Financial Stability	Reform	Reform 10: Addressing Aggressive Tax Planning								0																1	1
108	10 - 3.5 Safeguarding Fiscal and Financial Stability	Investment	Investment 1: Enhancement of the Supervisory Function of CYSEC	0.245							0																1
109	10 - 3.5 Safeguarding Fiscal and Financial Stability	Investment	Investment 2: Modernisation of Customs and Electronic Payment System	10.6						1	1									1
110	11 - 4.1 Upgrade infrastructure for connectivity	Reform	Reform 1: Empower the National Regulatory Authority (OCECPR)	0.5						1	1																1
111	11 - 4.1 Upgrade infrastructure for connectivity	Reform	Reform 2: Empower the national Broadband Competence Office (DEC of the DMRIDP)	0						1	1									1
112	11 - 4.1 Upgrade infrastructure for connectivity	Investment	Investment 1: Expansion of Very High Capacity Networks in underserved areas	35						1	1									1
113	11 - 4.1 Upgrade infrastructure for connectivity	Investment	Investment 2: Enhance building cabling to be “Gigabit-ready” and promote connectivity take-up	10						1	1									1
114	11 - 4.1 Upgrade infrastructure for connectivity	Investment	Investment 3: Submarine link to Greece	7.5						1	1									1
115	12 - 4.2 Promote e-government	Reform	Reform 1: Digital Services Factory	12.89						1	1									1
116	12 - 4.2 Promote e-government	Reform	Reform 2: Implementation of Government Cloud-G Cloud	3.28						1	1									1
117	12 - 4.2 Promote e-government	Reform	Reform 3: Police Procedures Digitalization Digipol	4.8						1	1									1							1
118	12 - 4.2 Promote e-government	Reform	Reform 4: Setting up the Beneficial Ownership Registry in accordance with Directive (EU) 2015/849	6						1	1																1
119	12 - 4.2 Promote e-government	Investment	Investment 1: Digitalisation in various Central Government Ministries - Services	8						1	1									1
120	12 - 4.2 Promote e-government	Investment	Investment 2: Digitalisation of the Cyprus Ports Authority	0.4						1	1									1
121	13 - 5.1 Educational system modernization, upskilling and retraining	Reform	Reform 1: Addressing skills mismatch between education and labour market (Secondary and Higher Education)	12.561	1						1	1			1				1
122	13 - 5.1 Educational system modernization, upskilling and retraining	Reform	Reform 2: A new teacher and evaluation system	0.55	1						1				1
123	13 - 5.1 Educational system modernization, upskilling and retraining	Reform	Reform 3: Extension of free compulsory pre-primary education from the age of four	12.225	1						1	1			1	1					1
124	13 - 5.1 Educational system modernization, upskilling and retraining	Reform	Reform 4: Digital transformation of school units with the aim of enhancing skills and skills related to STEM education	13.8	1					1	2				1	1				1	1
125	13 - 5.1 Educational system modernization, upskilling and retraining	Reform	Reform 5: E-Skills Action Plan – Implementation of specific actions	1.85	1					1	2	1			1						1
126	13 - 5.1 Educational system modernization, upskilling and retraining	Investment	Investment 1: Construction of 2 Model Technical Schools	38	1						1				1						1
127	13 - 5.1 Educational system modernization, upskilling and retraining	Investment	Investment 2: Skilling, Reskilling and Upskilling	14.9991	1						1	1			1		1	1	1	1	1			1	1	1
128	14 - 5.2 Labour Market	Reform	Reform 1: Reform of the Social Insurance System and Restructuring of the Social Insurance Services	10	1						1	1		1					1		1
129	14 - 5.2 Labour Market	Reform	Reform 2: Promotion of flexible forms of employment including teleworking	4	1						1					1			1		1
130	14 - 5.2 Labour Market	Investment	Investment 1: Improving the Effectiveness of the Department of Labour and Public Employment Services	8.64	1						1								1		1
132	14 - 5.2 Labour Market	Investment	Investment 2: Establishment of Multifunctional Centers and enhancement of the availability and affordability of Child Centers	23	1						1				1	1					1
133	14 - 5.2 Labour Market	Investment	Investment 3: Establishment of Home structures for children, adolescent with conduct disorders and persons with disabilities and long-term care for the elderly	15.4	1						1			1		1					1
134	14 - 5.2 Labour Market	Investment	Investment 4: Child Centres in Municipalities	5.5	1						1			1	1	1					1
127	13 - 5.1 Educational system modernization, upskilling and retraining	Investment	Investment 5: APOSTOLOY LOUKA SPECIAL NEEDS SCHOOL & RED CROSS RECOVERY SPECIAL NEEDS SCHOOL	15.1528	1						1			1		1					1
				1241.15
			No. of measures addressing each SDG		29	12	32	18	22	27		7	8	22	15	8	9	16	29	53	18	30	22	29	4	15	33	3
			Total budget of measures addressing each SDG		270.51	94.5948	462.583	152.08	308.025	236.53		72.1351	91.44	215.405	127.06	89.2578	93.7295	292.242	282.359	382.955	225.367	357.738	230.53	450.742	58.0391	122.359	84.3287	32.93
			Total budget of measures addressing each SDG as % of total budget of draft RRP (1.249 billion euros of priority A measures)		0.21795	0.0762152	0.372704	0.122531	0.248176	0.190573		0.0581194	0.0736734	0.173552	0.102372	0.0719152	0.075518	0.23546	0.227497	0.308548	0.181579	0.28823	0.185739	0.363164	0.0467622	0.098585	0.0679438	0.0265318
			No. of measures NOT addressing any transformation	32

## Sheet: Mapping_with_weights
Sequential Number	Component Reference	Reform / Investment	Measure -Short title	Cost	Transf. 1 - Education, Gender, Inequality	Transf. 2 - Health, Wellbeing, Demography	Transf. 3 - Energy Decar-bonisation & Sustainable Industry	Transf. 4 - Sustainable Food, Land, Water, Oceans	Transf. 5 - Sustainable Cities and Communities	Transf. 6 - Digital Revo-lution for Sustainable Development	check	Goal 1-No Poverty	Goal 2-Zero Hunger	Goal 3-Good Health & Well Being	Goal 4-Quality Education	Goal 5-Gender Equality	Goal 6-Clean Water & Sanitation	Goal 7-Affordable & Clean Energy	Goal 8-Decent Work & Economic Growth	Goal 9-Industry, Innovation & Infrastructure	Goal 10-Reduced Inequalities	Goal 11-Sustainable Cities & Communities	Goal 12-Responsible Consumption & Production	Goal 13-Climate Action	Goal 14-Life Below Water	Goal 15-Life On Land	Goal 16-Peace Justice & Strong Institutions	Goal 17-Partnerships for the Goals	SDG Score per measure	Total SDG score per component	Total SDG score per axis	Score per component per MEuro requested	Score per axis per MEuro requested	Score per component per no. of measures	Score per axis per no. of measures
1	1 - 1.1 Resilient and Effective Health System, Improved Civil Protection	Reform	Reform 1: National Centre for Clinical Documentation	4.32		3					3			3															3
2	1 - 1.1 Resilient and Effective Health System, Improved Civil Protection	Reform	Reform 2: Design an electronic platform for the surveillance of Nosocomical Antibiotic Consumption and Healthcare – Associated infections	5.7		3					3			3						2									5
4	1 - 1.1 Resilient and Effective Health System, Improved Civil Protection	Reform	Reform 3: Gradually shifting the focus from treatment and hospitalization to prevention and management of conditions, as the system moves towards value-based reimbursement models	2.5		3					3			3															3
5	1 - 1.1 Resilient and Effective Health System, Improved Civil Protection	Investment	Investment 1: New facilities Blood Establishment and procurement of the latest technology attendant equipment	46.45		3					3			3															3
6	1 - 1.1 Resilient and Effective Health System, Improved Civil Protection	Investment	Investment 2: Cyprus Innovative Public Health ICT System (CIPHIS)	4.5		3				3	6			3						2									5
7	1 - 1.1 Resilient and Effective Health System, Improved Civil Protection	Investment	Investment 3: Purchase/replacement of medical equipment in public and private hospitals	3		3					3			3															3
8	1 - 1.1 Resilient and Effective Health System, Improved Civil Protection	Investment	Investment 4: Accreditation of public and private hospitals	0.4		3					3			3															3
9	1 - 1.1 Resilient and Effective Health System, Improved Civil Protection	Investment	Investment 5: Enhancement, modernization and upgrade of Cyprus State Hospitals	1.94476		3					3			3															3
3	1 - 1.1 Resilient and Effective Health System, Improved Civil Protection	Reform	Investment 6: Deployment of generic cross border ehealth services in Cyprus	5		3				3	6			3						2									5
10	1 - 1.1 Resilient and Effective Health System, Improved Civil Protection	Investment	Investment 7: Public warning system for supporting emergency operations through SMS with additional options (e.g. TV, radio, social media, apps, etc.)	0.28		3				3	6			3						1		2		1					7	40	40	0.539849	0.539849	4	4
11	2 - 2.1 Climate neutrality, Energy efficiency and renewable energy penetration	Reform	Reform 1: Green Taxation	0			3				3							3				1	1	3		2		2	12
12	2 - 2.1 Climate neutrality, Energy efficiency and renewable energy penetration	Reform	Reform 2: Independence of Cyprus Transmission System Operator (TSOC) from the incumbent Electricity Authority of Cyprus	0			3				3							3				1		3					7
13	2 - 2.1 Climate neutrality, Energy efficiency and renewable energy penetration	Reform	Reform 3: Digital One-Stop Shops to streamline RES projects permitting and to facilitate Energy Renovation in Buildings	0.5			3				3							3				1		3					7
14	2 - 2.1 Climate neutrality, Energy efficiency and renewable energy penetration	Reform	Reform 4: Energy Storage Regulatory Framework	0			3				3							3				1		3					7
15	2 - 2.1 Climate neutrality, Energy efficiency and renewable energy penetration	Investment	Investment 1: Promoting energy efficiency investments in SMEs, municipalities, communities and the wider public sector	40			3				3							3				1		3					7
16	2 - 2.1 Climate neutrality, Energy efficiency and renewable energy penetration	Investment	Investment 2: Promoting renewables and individual energy efficiency measures and tackling energy poverty in households with disabled people	20.5	3	2	3				8	3		3				3			1	1		3					14
17	2 - 2.1 Climate neutrality, Energy efficiency and renewable energy penetration	Investment	Investment 3: Encouraging the use of renewables and energy savings by local/wider public authorities as well as NGOs and facilitate the transition of local communities towards climate mitigation & adaptation	12.502			3				3							3				1		3					7
18	2 - 2.1 Climate neutrality, Energy efficiency and renewable energy penetration	Investment	Investment 4: Reduction of CO2 emissions in industries, businesses and organizations	20			3				3		2				2	3		2		2	3	3		2			19
19	2 - 2.1 Climate neutrality, Energy efficiency and renewable energy penetration	Investment	Investment 5: Energy Efficiency Upgrading of public buildings	11.45			3				3							3											3
20	2 - 2.1 Climate neutrality, Energy efficiency and renewable energy penetration	Investment	Investment 6: Upgrading renewable energy and smart grids testing infrastructure at the University of Cyprus	1.59096	2		3				5				2			3		3				3					11
21	2 - 2.1 Climate neutrality, Energy efficiency and renewable energy penetration	Investment	Investment 7: Mass installation and operation by the Distribution System Operator (DSO) of Smart Metering Infrastructure (Advanced Metering Infrastructure)	35			3				3							3						3					6
22	2 - 2.1 Climate neutrality, Energy efficiency and renewable energy penetration	Investment	Investment 8: Monitoring and reduction of GHG emissions in agriculture	4.4			3	2			5		1										2	3					6
23	2 - 2.1 Climate neutrality, Energy efficiency and renewable energy penetration	Investment	Investment 9: Forests fire protection	18.67				3			3													3		3			6
24	2 - 2.1 Climate neutrality, Energy efficiency and renewable energy penetration	Investment	Investment 10: Market Management System to facilitate the opening of the electricity market to competition	4.7			3				3							3						3					6
25	2 - 2.1 Climate neutrality, Energy efficiency and renewable energy penetration	Investment	Investment 11: Ending energy isolation-Project of Common Interest "EuroAsia Interconnector"	100			3				3							3						3				2	8	126		0.467857		8.4
26	3 - 2.2 Sustainable transport	Reform	Reform 1: Establishment of an Intelligent Transportation System using Digital Twin technologies	4					2	3	5			1						3		2		2					8
27	3 - 2.2 Sustainable transport	Reform	Reform 2: Provide the regulatory framework for an interoperable and effective electric vehicle recharging infrastructure and an efficient EV recharging market;	0.2			3		3		6			3								3		2					8
28	3 - 2.2 Sustainable transport	Reform	Reform 3: Progressively phase out the most polluting vehicles, especially in polluted urban areas	0			3		3		6			3								3	3	2					11
29	3 - 2.2 Sustainable transport	Investment	Investment 1: Implementation of Sustainable Urban Mobility Projects (SUMP) and accessibility enhancing measures	31.5			3		3		6		1	3							2	3		3					12
30	3 - 2.2 Sustainable transport	Investment	Investment 2: Creation of electro-mobility infrastructure	6.79			3		3		6									3		3	3	3					12
31	3 - 2.2 Sustainable transport	Investment	Investment 3: Promote widespread use of Electric Vehicles (EVs)	48.8102			3		3		6											3	3	3					9	60		0.657173		10
32	4 - 2.3 Smart and Sustainable Water Management	Reform	Reform 1: Water Resource Management Reform	0.74				3	2		5						3					2	2			3			10
33	4 - 2.3 Smart and Sustainable Water Management	Investment	Investment 1: Khoirokoitia‐Famagusta Conveyor Replacement	11.7647					3		3						3					1							4
34	4 - 2.3 Smart and Sustainable Water Management	Investment	Investment 2: Water Treatment Plants (WTP) Upgrade for water quality improvement	6.01704					3		3			3			3					1							7
35	4 - 2.3 Smart and Sustainable Water Management	Investment	Investment 3: Integrated Monitoring and Control Management System for the Water Development Department’s (WDD) infrastructure	5.96				3	3		6						3			3		2	2			3			13
36	4 - 2.3 Smart and Sustainable Water Management	Investment	Investment 4: Smart Water Networks Management	22.2				2	2	3	7						2			3									5
37	4 - 2.3 Smart and Sustainable Water Management	Investment	Investment 5: Anti-flood and water collection measures	16					3		3											3		3		2			8
38	4 - 2.3 Smart and Sustainable Water Management	Investment	Investment 6: Enhance water security for Nicosia and Larnaca regions	6.04861					3		3						3												3
39	4 - 2.3 Smart and Sustainable Water Management	Investment	Investment 7: Eastern Nicosia infrastructure for wastewater treatment’s effluent re-use.	10.95				3	3		6											3	2			3			8
40	4 - 2.3 Smart and Sustainable Water Management	Investment	Investment 8: Protection of the Marine Environment from Oil Pollution	8.04			3	3			6			2											3	3			8	66	252	0.752391	0.562082	7.33333	8.4
41	6 - 3.1 New Growth Model and diversification of the economy	Reform	Reform 1: Move agricultural practices from the 20th century to the 21st century by investing in a national centre for excellence in agri-tech					3			3		3						2	2			3			2			12
42	6 - 3.1 New Growth Model and diversification of the economy	Reform	Reform 2: On-line, cloud-based platform for improving the trade and information symmetry in the fresh produce supply chain	0.54				3		3	6		3							3							2		8
43	6 - 3.1 New Growth Model and diversification of the economy	Reform	Reform 3: Genetic improvement of the Cyprus sheep and goat population	5				3			3		3													2			5
44	6 - 3.1 New Growth Model and diversification of the economy	Reform	Reform 4: Enhancement of Circular Economy in the Industry	15			3				3									2			3	3		2			10
45	6 - 3.1 New Growth Model and diversification of the economy	Reform	Reform 5: Establishment of a Coordinating Body between Central and Local Government	0			3		2		5											2	3	2			2		9
46	6 - 3.1 New Growth Model and diversification of the economy	Investment	Investment 1: Construction of a collaborative Marine Aquaculture Infrastructure (port and land facilities) in Pentakomo coastal area	29				3			3		2						3						1				6
47	6 - 3.1 New Growth Model and diversification of the economy	Investment	Investment 2: Enhancing the existing isotopic databases of Cypriot local traditional food/ drinks by developing a Block Chain platform, to ensure their identity	1				3			3		3							3			3			2	2		13
48	6 - 3.1 New Growth Model and diversification of the economy	Investment	Investment 3: Upskill the existing farming community and professionalise future labour force by investing in human capital		3			3			6	2			3				3		3		2			2			15
49	6 - 3.1 New Growth Model and diversification of the economy	Investment	Investment 4: Initiating the setup of the first Eco-Industrial Park	0.1			3	3			6								1	1									2
50	6 - 3.1 New Growth Model and diversification of the economy	Investment	Investment 5: Creation of a National Commercial Identity and promotion of traditional products	0.18				3			3					2			3	2		2	2						11
51	6 - 3.1 New Growth Model and diversification of the economy	Investment	Investment 6: Scheme for modernisation and digitalisation of enterprises engaged in manufacturing and trading of agricultural products	25			2			3	5									3			3						6
52	6 - 3.1 New Growth Model and diversification of the economy	Investment	Investment 7: Scheme for the Enhancement of Large Enterprises Competitiveness in the Manufacturing Sector	10			3				3								2	3									5
53	6 - 3.1 New Growth Model and diversification of the economy	Investment	Investment 8: Enhancing the sustainability and added value of the tourism sector	26					3		3								3										3
54	6 - 3.1 New Growth Model and diversification of the economy	Investment	Investment 9: Promotion of circular economy on hotel establishments	1.4			3				3				2								3						5
55	6 - 3.1 New Growth Model and diversification of the economy	Investment	Investment 10: Enrichment of the tourism product in rural, mountainous and remote areas	6.8	2		2		2		6								3		1	2							6
56	6 - 3.1 New Growth Model and diversification of the economy	Investment	Investment 11: Extension of Green Points National Network – Phase A and Phase B	10			2		3		5											3	3	3					9
57	6 - 3.1 New Growth Model and diversification of the economy	Investment	Investment 12: Waste Management towards Circular Economy	14.3			3	2	3		8											3	3	3					9
58	6 - 3.1 New Growth Model and diversification of the economy	Investment	Investment 13: Establishment of the Orounda Livestock Waste and Animal-By-Product (ABP) Management Facilities with a Biogas Production Unit	25			3	3	3		9			3				3				3	3	3					15	149		0.879991		8.27778
59	7 - 3.2 Enhanced Research & Innovation	Reform	Reform 1: Comprehensive national R&I Policy supported by data-driven policy tools to support the R&I Ecosystem and to enhance links between policy making and implementation		3					3	6								2	3								1	6
60	7 - 3.2 Enhanced Research & Innovation	Reform	Reform 2: Incentives to encourage and attract investments and human capital in R&I		3						3								3	3								1	7
61	7 - 3.2 Enhanced Research & Innovation	Reform	Reform 3: Introduce policies and incentives to facilitate and foster access to publicly funded research infrastructure and laboratories		3						3									3								1	4
62	7 - 3.2 Enhanced Research & Innovation	Investment	Investment 1: Setup and operate a central knowledge transfer office	3	3						3									3							2	2	7
63	7 - 3.2 Enhanced Research & Innovation	Investment	Investment 2: Innovation Funding Programs & Funding schemes for the enhancement of growth & competitiveness of startups, innovative companies and SMEs	52.0009	3						3								2	3								2	7
64	7 - 3.2 Enhanced Research & Innovation	Investment	Investment 3: Thematic research and innovation funding program on green transition	6	3		3	3			9						3	3	2	3			3	3	3	3		2	25
65	7 - 3.2 Enhanced Research & Innovation	Investment	Investment 4: Incentive scheme for the development of classified laboratories and deployment of classified communication networks in research and academic organizations including Centres of Excellence, academic institutions, research organizations as well as in companies engaged in R&I on dual use technologies	3	3		1				4									3							2	2	7	63		0.984362		9
66	8 - 3.3 Business support for competitiveness	Reform	Reform 1: Facilitation of Strategic investments								0								3	3									6
67	8 - 3.3 Business support for competitiveness	Reform	Reform 2: Enhancing Fast-Track Business Activation Mechanism								0								3	3									6
68	8 - 3.3 Business support for competitiveness	Reform	Reform 3: Modernisation of the Companies Law	1.75							0								3	3									6
69	8 - 3.3 Business support for competitiveness	Reform	Reform 4: Design and establish a National Promotional Agency	0							0								3	3									6
70	8 - 3.3 Business support for competitiveness	Reform	Reform 5: Incentives to promote mergers & acquisitions								0									3									3
71	8 - 3.3 Business support for competitiveness	Reform	Reform 6: Strategic Investor and digitalisation of the Cyprus Stock Exchange	0.71413							0								3	2									5
72	8 - 3.3 Business support for competitiveness	Investment	Investment 1: Integrated Information system for the Registrar of Companies and Official Receiver	6.58							0								3	3									6
73	8 - 3.3 Business support for competitiveness	Investment	Investment 2: Creation of a Regulatory Sandbox to enable FinTech	0.4							0								3	3									6
74	8 - 3.3 Business support for competitiveness	Investment	Investment 3: Consulting services for SMEs	4							0								3		2								5
75	8 - 3.3 Business support for competitiveness	Investment	Investment 4: Scheme for the digital upgrade of enterprises	10						3	3								3	3									6
76	8 - 3.3 Business support for competitiveness	Investment	Investment 5: Support the extroversion and the openness of Cypriot firms	8.43							0								3										3
77	8 - 3.3 Business support for competitiveness	Investment	Investment 6: State funded equity fund	20							0								3										3
78	8 - 3.3 Business support for competitiveness	Investment	Investment 7: Loan subsidization for new business loans	26.96							0								3										3	64		0.811831		4.92308
79	9 - 3.4 Public and Local Administration Reform, Judicial reform and Anti-corruption reform	Reform	Reform 1: Enhance the administrative capacity and improve the functioning of public administration for better policy making and implementation								0																3		3
80	9 - 3.4 Public and Local Administration Reform, Judicial reform and Anti-corruption reform	Reform	Reform 2: Regulate flexible working arrangements in the public sector		3	2					5																3		3
81	9 - 3.4 Public and Local Administration Reform, Judicial reform and Anti-corruption reform	Reform	Reform 3: Introduce new framework for evaluation and selection process for filling public service vacancies and new regulations for the evaluation of employees’ performance								0																3		3
82	9 - 3.4 Public and Local Administration Reform, Judicial reform and Anti-corruption reform	Reform	Reform 4: Strengthen administrative capacity and transparency through the professionalization of public procurement and further digitalization of its process	5							0																3		3
83	9 - 3.4 Public and Local Administration Reform, Judicial reform and Anti-corruption reform	Reform	Reform 5: Enhancement of the capacity of the Law Office	1.03							0																3		3
84	9 - 3.4 Public and Local Administration Reform, Judicial reform and Anti-corruption reform	Reform	Reform 6: New legal framework for Local Authorities and relevant support measures	0.84							0																3		3
85	9 - 3.4 Public and Local Administration Reform, Judicial reform and Anti-corruption reform	Reform	Reform 7: Urban land consolidation	0.45					3		3											1					3		4
86	9 - 3.4 Public and Local Administration Reform, Judicial reform and Anti-corruption reform	Reform	Reform 8: Efficiency and Functionality of Justice								0																3		3
87	9 - 3.4 Public and Local Administration Reform, Judicial reform and Anti-corruption reform	Reform	Reform 9: Digital transformation of courts	11.17						3	3									3							3		6	31		1.67658		3.44444
88	9 - 3.4 Public and Local Administration Reform, Judicial reform and Anti-corruption reform	Reform	Reform 10: Setting Up Anticorruption Agency (will include Training Awareness Campaign)	5.53							0																3		3
89	9 - 3.4 Public and Local Administration Reform, Judicial reform and Anti-corruption reform	Investment	Investment 1: Rationalisation of the shift system through the implementation of a Roster Planning System	0.55	3						3								2										2
90	9 - 3.4 Public and Local Administration Reform, Judicial reform and Anti-corruption reform	Investment	Investment 2: Digitalisation of the law-making process	1.72						3	3									3							3		6
91	9 - 3.4 Public and Local Administration Reform, Judicial reform and Anti-corruption reform	Investment	Investment 3: Economic Policy Modelling Hub	1.39	2						2				2					3									5
92	9 - 3.4 Public and Local Administration Reform, Judicial reform and Anti-corruption reform	Investment	Investment 4: Enhancing e-system for issuing building permits	1.12							0									3							3		6
93	9 - 3.4 Public and Local Administration Reform, Judicial reform and Anti-corruption reform	Investment	Investment 5: Smart cities	35					3	3	6									3		3	3						9
94	9 - 3.4 Public and Local Administration Reform, Judicial reform and Anti-corruption reform	Investment	Investment 6: Regeneration and Revitalization of Nicosia Inner City	29.4941					3		3								2			3							5
95	9 - 3.4 Public and Local Administration Reform, Judicial reform and Anti-corruption reform	Investment	Investment 7: Training of judges court staff	0.19368							0				1												3		4
96	9 - 3.4 Public and Local Administration Reform, Judicial reform and Anti-corruption reform	Investment	Investmetn 8: Upgrading the infrastructure of Courts	2.5						3	3																3		3
97	9 - 3.4 Public and Local Administration Reform, Judicial reform and Anti-corruption reform	Investment	Investment 9: Aid Scheme for the private and public sector for certification with ISO 37000 (Anti Bribery)	2							0																3		3
98	10 - 3.5 Safeguarding Fiscal and Financial Stability	Reform	Reform 1: Completing the legal framework for Crisis Management for Credit Institutions								0																3		3
99	10 - 3.5 Safeguarding Fiscal and Financial Stability	Reform	Reform 2: Framework and Action Plan for addressing NPLs								0																3		3
100	10 - 3.5 Safeguarding Fiscal and Financial Stability	Reform	Reform 3: Strategy for addressing inadequacies of the property transaction system (title deeds)								0									3							3		6
101	10 - 3.5 Safeguarding Fiscal and Financial Stability	Reform	Reform 4: New legal framework and System of exchange of data and credit								0									2							3		5
102	10 - 3.5 Safeguarding Fiscal and Financial Stability	Reform	Reform 5: Action plan for the development of a liability monitoring register								0																3		3
103	10 - 3.5 Safeguarding Fiscal and Financial Stability	Reform	Reform 6: Enhancement of the Insolvency Framework	0.76							0																3		3
104	10 - 3.5 Safeguarding Fiscal and Financial Stability	Reform	Reform 7: Strategy for Combating Financial Illiteracy		3						3				3						2								5
105	10 - 3.5 Safeguarding Fiscal and Financial Stability	Reform	Reform 8: Enhancing supervision of Insurance and Pension Funds								0																3		3
106	10 - 3.5 Safeguarding Fiscal and Financial Stability	Reform	Reform 9: Improving tax collection and effectiveness of the Tax Department	32.93							0																3	3	6
107	10 - 3.5 Safeguarding Fiscal and Financial Stability	Reform	Reform 10: Addressing Aggressive Tax Planning								0																3	3	6
108	10 - 3.5 Safeguarding Fiscal and Financial Stability	Investment	Investment 1: Enhancement of the Supervisory Function of CYSEC	0.245							0																3		3
109	10 - 3.5 Safeguarding Fiscal and Financial Stability	Investment	Investment 2: Modernisation of Customs and Electronic Payment System	10.6						3	3									3									3	95	402	0.765926	0.884143	4.31818	5.82609
110	11 - 4.1 Upgrade infrastructure for connectivity	Reform	Reform 1: Empower the National Regulatory Authority (OCECPR)	0.5						3	3																3		3
111	11 - 4.1 Upgrade infrastructure for connectivity	Reform	Reform 2: Empower the national Broadband Competence Office (DEC of the DMRIDP)	0						3	3									3									3
112	11 - 4.1 Upgrade infrastructure for connectivity	Investment	Investment 1: Expansion of Very High Capacity Networks in underserved areas	35						3	3									3									3
113	11 - 4.1 Upgrade infrastructure for connectivity	Investment	Investment 2: Enhance building cabling to be “Gigabit-ready” and promote connectivity take-up	10						3	3									3									3
114	11 - 4.1 Upgrade infrastructure for connectivity	Investment	Investment 3: Submarine link to Greece	7.5						3	3									3									3	15		0.283019		3
115	12 - 4.2 Promote e-government	Reform	Reform 1: Digital Services Factory	12.89						3	3									3									3
116	12 - 4.2 Promote e-government	Reform	Reform 2: Implementation of Government Cloud-G Cloud	3.28						3	3									3									3
117	12 - 4.2 Promote e-government	Reform	Reform 3: Police Procedures Digitalization Digipol	4.8						3	3									3							3		6
118	12 - 4.2 Promote e-government	Reform	Reform 4: Setting up the Beneficial Ownership Registry in accordance with Directive (EU) 2015/849	6						3	3																3		3
119	12 - 4.2 Promote e-government	Investment	Investment 1: Digitalisation in various Central Government Ministries - Services	8						3	3									3									3
120	12 - 4.2 Promote e-government	Investment	Investment 2: Digitalisation of the Cyprus Ports Authority	0.4						3	3									3									3	21	36	0.593723	0.407378	3.5	3.27273
121	13 - 5.1 Educational system modernization, upskilling and retraining	Reform	Reform 1: Addressing skills mismatch between education and labour market (Secondary and Higher Education)	12.561	3						3	2			3				3										8
122	13 - 5.1 Educational system modernization, upskilling and retraining	Reform	Reform 2: A new teacher and evaluation system	0.55	3						3				3														3
123	13 - 5.1 Educational system modernization, upskilling and retraining	Reform	Reform 3: Extension of free compulsory pre-primary education from the age of four	12.225	3						3	2			3	3					1								9
124	13 - 5.1 Educational system modernization, upskilling and retraining	Reform	Reform 4: Digital transformation of school units with the aim of enhancing skills and skills related to STEM education	13.8	3					3	6				3	2				3	1								9
125	13 - 5.1 Educational system modernization, upskilling and retraining	Reform	Reform 5: E-Skills Action Plan – Implementation of specific actions	1.85	3					3	6	2			3						3								8
126	13 - 5.1 Educational system modernization, upskilling and retraining	Investment	Investment 1: Construction of 2 Model Technical Schools	38	3						3				3						2								5
127	13 - 5.1 Educational system modernization, upskilling and retraining	Investment	Investment 2: Skilling, Reskilling and Upskilling	14.9991	3						3	2			2	2	2	2	3	2	3			2	2	2			24	66		0.702239		9.42857
128	14 - 5.2 Labour Market	Reform	Reform 1: Reform of the Social Insurance System and Restructuring of the Social Insurance Services	10	3						3	2		2					3		3						1		11
129	14 - 5.2 Labour Market	Reform	Reform 2: Promotion of flexible forms of employment including teleworking	4	3						3					3			3		2								8
130	14 - 5.2 Labour Market	Investment	Investment 1: Improving the Effectiveness of the Department of Labour and Public Employment Services	8.64	3						3								3		2						1		6
132	14 - 5.2 Labour Market	Investment	Investment 2: Establishment of Multifunctional Centers and enhancement of the availability and affordability of Child Centers	23	3						3	2			3	3					3								11
133	14 - 5.2 Labour Market	Investment	Investment 3: Establishment of Home structures for children, adolescent with conduct disorders and persons with disabilities and long-term care for the elderly	15.4	3						3			2		3					2								7
134	14 - 5.2 Labour Market	Investment	Investment 4: Child Centres in Municipalities	5.5	3						3	1		2	2	3					3								11
127	14 - 5.2 Labour Market	Investment	Investment 5: APOSTOLOY LOUKA SPECIAL NEEDS SCHOOL & RED CROSS RECOVERY SPECIAL NEEDS SCHOOL	15.1528	3						3	1		3		2					2								8	62	128	0.75894	0.728606	8.85714	9.14286
				1241.15
			Total score		84	34	91	51	64	81		19	18	60	38	23	24	47	84	145	38	62	58	80	9	36	96	21			858
			Total budget of measures addressing each SDG		801.748	263.284	1339.95	415.34	920.334	709.59		231.423	153.52	599.274	355.912	268.639	223.989	861.727	769.233	1082.01	452.758	851.787	669.361	1332.47	101.118	295.078	264.086	426.792
			Total budget of measures addressing each SDG as % of total budget of draft RRP (1.249 billion euros of priority A measures)		0.64597	0.212129	1.0796	0.33464	0.741515	0.571718		0.186458	0.123691	0.482836	0.286759	0.216443	0.180469	0.694295	0.619772	0.871779	0.364788	0.686286	0.539305	1.07357	0.0814711	0.237745	0.212775	0.343867
			No. of measures NOT addressing any transformation	32

## Sheet: Mapping_with_weights_squared
Sequential Number	Component Reference	Reform / Investment	Measure -Short title	Cost	Transf. 1 - Education, Gender, Inequality	Transf. 2 - Health, Wellbeing, Demography	Transf. 3 - Energy Decar-bonisation & Sustainable Industry	Transf. 4 - Sustainable Food, Land, Water, Oceans	Transf. 5 - Sustainable Cities and Communities	Transf. 6 - Digital Revo-lution for Sustainable Development	check	Goal 1-No Poverty	Goal 2-Zero Hunger	Goal 3-Good Health & Well Being	Goal 4-Quality Education	Goal 5-Gender Equality	Goal 6-Clean Water & Sanitation	Goal 7-Affordable & Clean Energy	Goal 8-Decent Work & Economic Growth	Goal 9-Industry, Innovation & Infrastructure	Goal 10-Reduced Inequalities	Goal 11-Sustainable Cities & Communities	Goal 12-Responsible Consumption & Production	Goal 13-Climate Action	Goal 14-Life Below Water	Goal 15-Life On Land	Goal 16-Peace Justice & Strong Institutions	Goal 17-Partnerships for the Goals	SDG Score per measure	Total SDG score per component	Total SDG score per axis	Score per component per MEuro requested	Score per axis per MEuro requested	Score per component per no. of measures	Score per axis per no. of measures
1	1 - 1.1 Resilient and Effective Health System, Improved Civil Protection	Reform	Reform 1: National Centre for Clinical Documentation	4.32		9					9			9															9
2	1 - 1.1 Resilient and Effective Health System, Improved Civil Protection	Reform	Reform 2: Design an electronic platform for the surveillance of Nosocomical Antibiotic Consumption and Healthcare – Associated infections	5.7		9					9			9						4									13
4	1 - 1.1 Resilient and Effective Health System, Improved Civil Protection	Reform	Reform 3: Gradually shifting the focus from treatment and hospitalization to prevention and management of conditions, as the system moves towards value-based reimbursement models	2.5		9					9			9															9
5	1 - 1.1 Resilient and Effective Health System, Improved Civil Protection	Investment	Investment 1: New facilities Blood Establishment and procurement of the latest technology attendant equipment	46.45		9					9			9															9
6	1 - 1.1 Resilient and Effective Health System, Improved Civil Protection	Investment	Investment 2: Cyprus Innovative Public Health ICT System (CIPHIS)	4.5		9				9	18			9						4									13
7	1 - 1.1 Resilient and Effective Health System, Improved Civil Protection	Investment	Investment 3: Purchase/replacement of medical equipment in public and private hospitals	3		9					9			9															9
8	1 - 1.1 Resilient and Effective Health System, Improved Civil Protection	Investment	Investment 4: Accreditation of public and private hospitals	0.4		9					9			9															9
9	1 - 1.1 Resilient and Effective Health System, Improved Civil Protection	Investment	Investment 5: Enhancement, modernization and upgrade of Cyprus State Hospitals	1.94476		9					9			9															9
3	1 - 1.1 Resilient and Effective Health System, Improved Civil Protection	Reform	Investment 6: Deployment of generic cross border ehealth services in Cyprus	5		9				9	18			9						4									13
10	1 - 1.1 Resilient and Effective Health System, Improved Civil Protection	Investment	Investment 7: Public warning system for supporting emergency operations through SMS with additional options (e.g. TV, radio, social media, apps, etc.)	0.28		9				9	18			9						1		4		1					15	108	108	1.45759	1.45759	10.8	10.8
11	2 - 2.1 Climate neutrality, Energy efficiency and renewable energy penetration	Reform	Reform 1: Green Taxation	0			9				9							9				1	1	9		4		4	28
12	2 - 2.1 Climate neutrality, Energy efficiency and renewable energy penetration	Reform	Reform 2: Independence of Cyprus Transmission System Operator (TSOC) from the incumbent Electricity Authority of Cyprus	0			9				9							9				1		9					19
13	2 - 2.1 Climate neutrality, Energy efficiency and renewable energy penetration	Reform	Reform 3: Digital One-Stop Shops to streamline RES projects permitting and to facilitate Energy Renovation in Buildings	0.5			9				9							9				1		9					19
14	2 - 2.1 Climate neutrality, Energy efficiency and renewable energy penetration	Reform	Reform 4: Energy Storage Regulatory Framework	0			9				9							9				1		9					19
15	2 - 2.1 Climate neutrality, Energy efficiency and renewable energy penetration	Investment	Investment 1: Promoting energy efficiency investments in SMEs, municipalities, communities and the wider public sector	40			9				9							9				1		9					19
16	2 - 2.1 Climate neutrality, Energy efficiency and renewable energy penetration	Investment	Investment 2: Promoting renewables and individual energy efficiency measures and tackling energy poverty in households with disabled people	20.5	9	4	9				22	9		9				9			1	1		9					38
17	2 - 2.1 Climate neutrality, Energy efficiency and renewable energy penetration	Investment	Investment 3: Encouraging the use of renewables and energy savings by local/wider public authorities as well as NGOs and facilitate the transition of local communities towards climate mitigation & adaptation	12.502			9				9							9				1		9					19
18	2 - 2.1 Climate neutrality, Energy efficiency and renewable energy penetration	Investment	Investment 4: Reduction of CO2 emissions in industries, businesses and organizations	20			9				9		4				4	9		4		4	9	9		4			47
19	2 - 2.1 Climate neutrality, Energy efficiency and renewable energy penetration	Investment	Investment 5: Energy Efficiency Upgrading of public buildings	11.45			9				9							9											9
20	2 - 2.1 Climate neutrality, Energy efficiency and renewable energy penetration	Investment	Investment 6: Upgrading renewable energy and smart grids testing infrastructure at the University of Cyprus	1.59096	4		9				13				4			9		9				9					31
21	2 - 2.1 Climate neutrality, Energy efficiency and renewable energy penetration	Investment	Investment 7: Mass installation and operation by the Distribution System Operator (DSO) of Smart Metering Infrastructure (Advanced Metering Infrastructure)	35			9				9							9						9					18
22	2 - 2.1 Climate neutrality, Energy efficiency and renewable energy penetration	Investment	Investment 8: Monitoring and reduction of GHG emissions in agriculture	4.4			9	4			13		1										4	9					14
23	2 - 2.1 Climate neutrality, Energy efficiency and renewable energy penetration	Investment	Investment 9: Forests fire protection	18.67				9			9													9		9			18
24	2 - 2.1 Climate neutrality, Energy efficiency and renewable energy penetration	Investment	Investment 10: Market Management System to facilitate the opening of the electricity market to competition	4.7			9				9							9						9					18
25	2 - 2.1 Climate neutrality, Energy efficiency and renewable energy penetration	Investment	Investment 11: Ending energy isolation-Project of Common Interest "EuroAsia Interconnector"	100			9				9							9						9				4	22	338		1.25505		22.5333
26	3 - 2.2 Sustainable transport	Reform	Reform 1: Establishment of an Intelligent Transportation System using Digital Twin technologies	4					4	9	13			1						9		4		4					18
27	3 - 2.2 Sustainable transport	Reform	Reform 2: Provide the regulatory framework for an interoperable and effective electric vehicle recharging infrastructure and an efficient EV recharging market;	0.2			9		9		18			9								9		4					22
28	3 - 2.2 Sustainable transport	Reform	Reform 3: Progressively phase out the most polluting vehicles, especially in polluted urban areas	0			9		9		18			9								9	9	4					31
29	3 - 2.2 Sustainable transport	Investment	Investment 1: Implementation of Sustainable Urban Mobility Projects (SUMP) and accessibility enhancing measures	31.5			9		9		18		1	9							4	9		9					32
30	3 - 2.2 Sustainable transport	Investment	Investment 2: Creation of electro-mobility infrastructure	6.79			9		9		18									9		9	9	9					36
31	3 - 2.2 Sustainable transport	Investment	Investment 3: Promote widespread use of Electric Vehicles (EVs)	48.8102			9		9		18											9	9	9					27	166		1.81818		27.6667
32	4 - 2.3 Smart and Sustainable Water Management	Reform	Reform 1: Water Resource Management Reform	0.74				9	4		13						9					4	4			9			26
33	4 - 2.3 Smart and Sustainable Water Management	Investment	Investment 1: Khoirokoitia‐Famagusta Conveyor Replacement	11.7647					9		9						9					1							10
34	4 - 2.3 Smart and Sustainable Water Management	Investment	Investment 2: Water Treatment Plants (WTP) Upgrade for water quality improvement	6.01704					9		9			9			9					1							19
35	4 - 2.3 Smart and Sustainable Water Management	Investment	Investment 3: Integrated Monitoring and Control Management System for the Water Development Department’s (WDD) infrastructure	5.96				9	9		18						9			9		4	4			9			35
36	4 - 2.3 Smart and Sustainable Water Management	Investment	Investment 4: Smart Water Networks Management	22.2				4	4	9	17						4			9									13
37	4 - 2.3 Smart and Sustainable Water Management	Investment	Investment 5: Anti-flood and water collection measures	16					9		9											9		9		4			22
38	4 - 2.3 Smart and Sustainable Water Management	Investment	Investment 6: Enhance water security for Nicosia and Larnaca regions	6.04861					9		9						9												9
39	4 - 2.3 Smart and Sustainable Water Management	Investment	Investment 7: Eastern Nicosia infrastructure for wastewater treatment’s effluent re-use.	10.95				9	9		18											9	4			9			22
40	4 - 2.3 Smart and Sustainable Water Management	Investment	Investment 8: Protection of the Marine Environment from Oil Pollution	8.04			9	9			18			4											9	9			22	178	682	2.02918	1.52119	19.7778	22.7333
41	6 - 3.1 New Growth Model and diversification of the economy	Reform	Reform 1: Move agricultural practices from the 20th century to the 21st century by investing in a national centre for excellence in agri-tech					9			9		9						4	4			9			4			30
42	6 - 3.1 New Growth Model and diversification of the economy	Reform	Reform 2: On-line, cloud-based platform for improving the trade and information symmetry in the fresh produce supply chain	0.54				9		9	18		9							9							4		22
43	6 - 3.1 New Growth Model and diversification of the economy	Reform	Reform 3: Genetic improvement of the Cyprus sheep and goat population	5				9			9		9													4			13
44	6 - 3.1 New Growth Model and diversification of the economy	Reform	Reform 4: Enhancement of Circular Economy in the Industry	15			9				9									4			9	9		4			26
45	6 - 3.1 New Growth Model and diversification of the economy	Reform	Reform 5: Establishment of a Coordinating Body between Central and Local Government	0			9		4		13											4	9	4			4		21
46	6 - 3.1 New Growth Model and diversification of the economy	Investment	Investment 1: Construction of a collaborative Marine Aquaculture Infrastructure (port and land facilities) in Pentakomo coastal area	29				9			9		4						9						1				14
47	6 - 3.1 New Growth Model and diversification of the economy	Investment	Investment 2: Enhancing the existing isotopic databases of Cypriot local traditional food/ drinks by developing a Block Chain platform, to ensure their identity	1				9			9		9							9			9			4	4		35
48	6 - 3.1 New Growth Model and diversification of the economy	Investment	Investment 3: Upskill the existing farming community and professionalise future labour force by investing in human capital		9			9			18	4			9				9		9		4			4			39
49	6 - 3.1 New Growth Model and diversification of the economy	Investment	Investment 4: Initiating the setup of the first Eco-Industrial Park	0.1			9	9			18								1	1									2
50	6 - 3.1 New Growth Model and diversification of the economy	Investment	Investment 5: Creation of a National Commercial Identity and promotion of traditional products	0.18				9			9					4			9	4		4	4						25
51	6 - 3.1 New Growth Model and diversification of the economy	Investment	Investment 6: Scheme for modernisation and digitalisation of enterprises engaged in manufacturing and trading of agricultural products	25			4			9	13									9			9						18
52	6 - 3.1 New Growth Model and diversification of the economy	Investment	Investment 7: Scheme for the Enhancement of Large Enterprises Competitiveness in the Manufacturing Sector	10			9				9								4	9									13
53	6 - 3.1 New Growth Model and diversification of the economy	Investment	Investment 8: Enhancing the sustainability and added value of the tourism sector	26					9		9								9										9
54	6 - 3.1 New Growth Model and diversification of the economy	Investment	Investment 9: Promotion of circular economy on hotel establishments	1.4			9				9				4								9						13
55	6 - 3.1 New Growth Model and diversification of the economy	Investment	Investment 10: Enrichment of the tourism product in rural, mountainous and remote areas	6.8	4		4		4		12								9		1	4							14
56	6 - 3.1 New Growth Model and diversification of the economy	Investment	Investment 11: Extension of Green Points National Network – Phase A and Phase B	10			4		9		13											9	9	9					27
57	6 - 3.1 New Growth Model and diversification of the economy	Investment	Investment 12: Waste Management towards Circular Economy	14.3			9	4	9		22											9	9	9					27
58	6 - 3.1 New Growth Model and diversification of the economy	Investment	Investment 13: Establishment of the Orounda Livestock Waste and Animal-By-Product (ABP) Management Facilities with a Biogas Production Unit	25			9	9	9		27			9				9				9	9	9					45	393		2.32105		21.8333
59	7 - 3.2 Enhanced Research & Innovation	Reform	Reform 1: Comprehensive national R&I Policy supported by data-driven policy tools to support the R&I Ecosystem and to enhance links between policy making and implementation		9					9	18								4	9								1	14
60	7 - 3.2 Enhanced Research & Innovation	Reform	Reform 2: Incentives to encourage and attract investments and human capital in R&I		9						9								9	9								1	19
61	7 - 3.2 Enhanced Research & Innovation	Reform	Reform 3: Introduce policies and incentives to facilitate and foster access to publicly funded research infrastructure and laboratories		9						9									9								1	10
62	7 - 3.2 Enhanced Research & Innovation	Investment	Investment 1: Setup and operate a central knowledge transfer office	3	9						9									9							4	4	17
63	7 - 3.2 Enhanced Research & Innovation	Investment	Investment 2: Innovation Funding Programs & Funding schemes for the enhancement of growth & competitiveness of startups, innovative companies and SMEs	52.0009	9						9								4	9								4	17
64	7 - 3.2 Enhanced Research & Innovation	Investment	Investment 3: Thematic research and innovation funding program on green transition	6	9		9	9			27						9	9	4	9			9	9	9	9		4	71
65	7 - 3.2 Enhanced Research & Innovation	Investment	Investment 4: Incentive scheme for the development of classified laboratories and deployment of classified communication networks in research and academic organizations including Centres of Excellence, academic institutions, research organizations as well as in companies engaged in R&I on dual use technologies	3	9		1				10									9							4	4	17	165		2.57809		23.5714
66	8 - 3.3 Business support for competitiveness	Reform	Reform 1: Facilitation of Strategic investments								0								9	9									18
67	8 - 3.3 Business support for competitiveness	Reform	Reform 2: Enhancing Fast-Track Business Activation Mechanism								0								9	9									18
68	8 - 3.3 Business support for competitiveness	Reform	Reform 3: Modernisation of the Companies Law	1.75							0								9	9									18
69	8 - 3.3 Business support for competitiveness	Reform	Reform 4: Design and establish a National Promotional Agency	0							0								9	9									18
70	8 - 3.3 Business support for competitiveness	Reform	Reform 5: Incentives to promote mergers & acquisitions								0									9									9
71	8 - 3.3 Business support for competitiveness	Reform	Reform 6: Strategic Investor and digitalisation of the Cyprus Stock Exchange	0.71413							0								9	4									13
72	8 - 3.3 Business support for competitiveness	Investment	Investment 1: Integrated Information system for the Registrar of Companies and Official Receiver	6.58							0								9	9									18
73	8 - 3.3 Business support for competitiveness	Investment	Investment 2: Creation of a Regulatory Sandbox to enable FinTech	0.4							0								9	9									18
74	8 - 3.3 Business support for competitiveness	Investment	Investment 3: Consulting services for SMEs	4							0								9		4								13
75	8 - 3.3 Business support for competitiveness	Investment	Investment 4: Scheme for the digital upgrade of enterprises	10						9	9								9	9									18
76	8 - 3.3 Business support for competitiveness	Investment	Investment 5: Support the extroversion and the openness of Cypriot firms	8.43							0								9										9
77	8 - 3.3 Business support for competitiveness	Investment	Investment 6: State funded equity fund	20							0								9										9
78	8 - 3.3 Business support for competitiveness	Investment	Investment 7: Loan subsidization for new business loans	26.96							0								9										9	188		2.38475		14.4615
79	9 - 3.4 Public and Local Administration Reform, Judicial reform and Anti-corruption reform	Reform	Reform 1: Enhance the administrative capacity and improve the functioning of public administration for better policy making and implementation								0																9		9
80	9 - 3.4 Public and Local Administration Reform, Judicial reform and Anti-corruption reform	Reform	Reform 2: Regulate flexible working arrangements in the public sector		9	4					13																9		9
81	9 - 3.4 Public and Local Administration Reform, Judicial reform and Anti-corruption reform	Reform	Reform 3: Introduce new framework for evaluation and selection process for filling public service vacancies and new regulations for the evaluation of employees’ performance								0																9		9
82	9 - 3.4 Public and Local Administration Reform, Judicial reform and Anti-corruption reform	Reform	Reform 4: Strengthen administrative capacity and transparency through the professionalization of public procurement and further digitalization of its process	5							0																9		9
83	9 - 3.4 Public and Local Administration Reform, Judicial reform and Anti-corruption reform	Reform	Reform 5: Enhancement of the capacity of the Law Office	1.03							0																9		9
84	9 - 3.4 Public and Local Administration Reform, Judicial reform and Anti-corruption reform	Reform	Reform 6: New legal framework for Local Authorities and relevant support measures	0.84							0																9		9
85	9 - 3.4 Public and Local Administration Reform, Judicial reform and Anti-corruption reform	Reform	Reform 7: Urban land consolidation	0.45					9		9											1					9		10
86	9 - 3.4 Public and Local Administration Reform, Judicial reform and Anti-corruption reform	Reform	Reform 8: Efficiency and Functionality of Justice								0																9		9
87	9 - 3.4 Public and Local Administration Reform, Judicial reform and Anti-corruption reform	Reform	Reform 9: Digital transformation of courts	11.17						9	9									9							9		18	91		4.92158		10.1111
88	9 - 3.4 Public and Local Administration Reform, Judicial reform and Anti-corruption reform	Reform	Reform 10: Setting Up Anticorruption Agency (will include Training Awareness Campaign)	5.53							0																9		9
89	9 - 3.4 Public and Local Administration Reform, Judicial reform and Anti-corruption reform	Investment	Investment 1: Rationalisation of the shift system through the implementation of a Roster Planning System	0.55	9						9								4										4
90	9 - 3.4 Public and Local Administration Reform, Judicial reform and Anti-corruption reform	Investment	Investment 2: Digitalisation of the law-making process	1.72						9	9									9							9		18
91	9 - 3.4 Public and Local Administration Reform, Judicial reform and Anti-corruption reform	Investment	Investment 3: Economic Policy Modelling Hub	1.39	4						4				4					9									13
92	9 - 3.4 Public and Local Administration Reform, Judicial reform and Anti-corruption reform	Investment	Investment 4: Enhancing e-system for issuing building permits	1.12							0									9							9		18
93	9 - 3.4 Public and Local Administration Reform, Judicial reform and Anti-corruption reform	Investment	Investment 5: Smart cities	35					9	9	18									9		9	9						27
94	9 - 3.4 Public and Local Administration Reform, Judicial reform and Anti-corruption reform	Investment	Investment 6: Regeneration and Revitalization of Nicosia Inner City	29.4941					9		9								4			9							13
95	9 - 3.4 Public and Local Administration Reform, Judicial reform and Anti-corruption reform	Investment	Investment 7: Training of judges court staff	0.19368							0				1												9		10
96	9 - 3.4 Public and Local Administration Reform, Judicial reform and Anti-corruption reform	Investment	Investmetn 8: Upgrading the infrastructure of Courts	2.5						9	9																9		9
97	9 - 3.4 Public and Local Administration Reform, Judicial reform and Anti-corruption reform	Investment	Investment 9: Aid Scheme for the private and public sector for certification with ISO 37000 (Anti Bribery)	2							0																9		9
98	10 - 3.5 Safeguarding Fiscal and Financial Stability	Reform	Reform 1: Completing the legal framework for Crisis Management for Credit Institutions								0																9		9
99	10 - 3.5 Safeguarding Fiscal and Financial Stability	Reform	Reform 2: Framework and Action Plan for addressing NPLs								0																9		9
100	10 - 3.5 Safeguarding Fiscal and Financial Stability	Reform	Reform 3: Strategy for addressing inadequacies of the property transaction system (title deeds)								0									9							9		18
101	10 - 3.5 Safeguarding Fiscal and Financial Stability	Reform	Reform 4: New legal framework and System of exchange of data and credit								0									4							9		13
102	10 - 3.5 Safeguarding Fiscal and Financial Stability	Reform	Reform 5: Action plan for the development of a liability monitoring register								0																9		9
103	10 - 3.5 Safeguarding Fiscal and Financial Stability	Reform	Reform 6: Enhancement of the Insolvency Framework	0.76							0																9		9
104	10 - 3.5 Safeguarding Fiscal and Financial Stability	Reform	Reform 7: Strategy for Combating Financial Illiteracy		9						9				9						4								13
105	10 - 3.5 Safeguarding Fiscal and Financial Stability	Reform	Reform 8: Enhancing supervision of Insurance and Pension Funds								0																9		9
106	10 - 3.5 Safeguarding Fiscal and Financial Stability	Reform	Reform 9: Improving tax collection and effectiveness of the Tax Department	32.93							0																9	9	18
107	10 - 3.5 Safeguarding Fiscal and Financial Stability	Reform	Reform 10: Addressing Aggressive Tax Planning								0																9	9	18
108	10 - 3.5 Safeguarding Fiscal and Financial Stability	Investment	Investment 1: Enhancement of the Supervisory Function of CYSEC	0.245							0																9		9
109	10 - 3.5 Safeguarding Fiscal and Financial Stability	Investment	Investment 2: Modernisation of Customs and Electronic Payment System	10.6						9	9									9									9	273	1110	2.20103	2.44129	12.4091	16.087
110	11 - 4.1 Upgrade infrastructure for connectivity	Reform	Reform 1: Empower the National Regulatory Authority (OCECPR)	0.5						9	9																9		9
111	11 - 4.1 Upgrade infrastructure for connectivity	Reform	Reform 2: Empower the national Broadband Competence Office (DEC of the DMRIDP)	0						9	9									9									9
112	11 - 4.1 Upgrade infrastructure for connectivity	Investment	Investment 1: Expansion of Very High Capacity Networks in underserved areas	35						9	9									9									9
113	11 - 4.1 Upgrade infrastructure for connectivity	Investment	Investment 2: Enhance building cabling to be “Gigabit-ready” and promote connectivity take-up	10						9	9									9									9
114	11 - 4.1 Upgrade infrastructure for connectivity	Investment	Investment 3: Submarine link to Greece	7.5						9	9									9									9	45		0.849057		9
115	12 - 4.2 Promote e-government	Reform	Reform 1: Digital Services Factory	12.89						9	9									9									9
116	12 - 4.2 Promote e-government	Reform	Reform 2: Implementation of Government Cloud-G Cloud	3.28						9	9									9									9
117	12 - 4.2 Promote e-government	Reform	Reform 3: Police Procedures Digitalization Digipol	4.8						9	9									9							9		18
118	12 - 4.2 Promote e-government	Reform	Reform 4: Setting up the Beneficial Ownership Registry in accordance with Directive (EU) 2015/849	6						9	9																9		9
119	12 - 4.2 Promote e-government	Investment	Investment 1: Digitalisation in various Central Government Ministries - Services	8						9	9									9									9
120	12 - 4.2 Promote e-government	Investment	Investment 2: Digitalisation of the Cyprus Ports Authority	0.4						9	9									9									9	63	108	1.78117	1.22213	10.5	9.81818
121	13 - 5.1 Educational system modernization, upskilling and retraining	Reform	Reform 1: Addressing skills mismatch between education and labour market (Secondary and Higher Education)	12.561	9						9	4			9				9										22
122	13 - 5.1 Educational system modernization, upskilling and retraining	Reform	Reform 2: A new teacher and evaluation system	0.55	9						9				9														9
123	13 - 5.1 Educational system modernization, upskilling and retraining	Reform	Reform 3: Extension of free compulsory pre-primary education from the age of four	12.225	9						9	4			9	9					1								23
124	13 - 5.1 Educational system modernization, upskilling and retraining	Reform	Reform 4: Digital transformation of school units with the aim of enhancing skills and skills related to STEM education	13.8	9					9	18				9	4				9	1								23
125	13 - 5.1 Educational system modernization, upskilling and retraining	Reform	Reform 5: E-Skills Action Plan – Implementation of specific actions	1.85	9					9	18	4			9						9								22
126	13 - 5.1 Educational system modernization, upskilling and retraining	Investment	Investment 1: Construction of 2 Model Technical Schools	38	9						9				9						4								13
127	13 - 5.1 Educational system modernization, upskilling and retraining	Investment	Investment 2: Skilling, Reskilling and Upskilling	14.9991	9						9	4			4	4	4	4	9	4	9			4	4	4			54	166		1.76624		23.7143
128	14 - 5.2 Labour Market	Reform	Reform 1: Reform of the Social Insurance System and Restructuring of the Social Insurance Services	10	9						9	4		4					9		9						1		27
129	14 - 5.2 Labour Market	Reform	Reform 2: Promotion of flexible forms of employment including teleworking	4	9						9					9			9		4								22
130	14 - 5.2 Labour Market	Investment	Investment 1: Improving the Effectiveness of the Department of Labour and Public Employment Services	8.64	9						9								9		4						1		14
132	14 - 5.2 Labour Market	Investment	Investment 2: Establishment of Multifunctional Centers and enhancement of the availability and affordability of Child Centers	23	9						9	4			9	9					9								31
133	14 - 5.2 Labour Market	Investment	Investment 3: Establishment of Home structures for children, adolescent with conduct disorders and persons with disabilities and long-term care for the elderly	15.4	9						9			4		9					4								17
134	14 - 5.2 Labour Market	Investment	Investment 4: Child Centres in Municipalities	5.5	9						9	1		4	4	9					9								27
127	14 - 5.2 Labour Market	Investment	Investment 5: APOSTOLOY LOUKA SPECIAL NEEDS SCHOOL & RED CROSS RECOVERY SPECIAL NEEDS SCHOOL	15.1528	9						9	1		9		4					4								18	156	322	1.90959	1.8329	22.2857	23
				1241.15
			Total score		246	98	265	147	182	243		39	46	170	102	61	66	139	236	411	90	150	160	228	23	90	274	45			2330
			Total budget of measures addressing each SDG		2385.68	748.853	3930.25	1164.22	2693.52	2128.77		503.693	290.76	1711.94	1017.59	717.653	557.57	2555.18	2111.41	3113.09	1018.24	2295.97	1963.62	3958.44	215.356	741.236	739.898	952.373
			Total budget of measures addressing each SDG as % of total budget of draft RRP (1.249 billion euros of priority A measures)		1.92215	0.603352	3.16661	0.938014	2.17018	1.71515		0.405827	0.234266	1.37931	0.819872	0.578214	0.449235	2.05872	1.70117	2.50822	0.820397	1.84987	1.58209	3.18933	0.173513	0.597216	0.596137	0.767329
			No. of measures NOT addressing any transformation	32

## Sheet: Sheet2
	SDG 1	SDG 2	SDG 3	SDG 4	SDG 5	SDG 6	SDG 7	SDG 8	SDG 9	SDG 10	SDG 11	SDG 12	SDG 13	SDG 14	SDG 15	SDG 16	SDG 17
	Goal 1-No Poverty	Goal 2-Zero Hunger	Goal 3-Good Health & Well Being	Goal 4-Quality Education	Goal 5-Gender Equality	Goal 6-Clean Water & Sanitation	Goal 7-Affordable & Clean Energy	Goal 8-Decent Work & Economic Growth	Goal 9-Industry, Innovation & Infrastructure	Goal 10-Reduced Inequalities	Goal 11-Sustainable Cities & Communities	Goal 12-Responsible Consumption & Production	Goal 13-Climate Action	Goal 14-Life Below Water	Goal 15-Life On Land	Goal 16-Peace Justice & Strong Institutions	Goal 17-Partnerships for the Goals
No. of measures addressing each SDG	7	8	22	15	8	9	16	29	53	18	30	22	29	4	15	33	3
No. of measures addressing each SDG as % of all measures	0.0518519	0.0592593	0.162963	0.111111	0.0592593	0.0666667	0.118519	0.214815	0.392593	0.133333	0.222222	0.162963	0.214815	0.0296296	0.111111	0.244444	0.0222222
Total budget of measures addressing each SDG (mio Euros)	72.1351	91.44	215.405	127.06	89.2578	93.7295	292.242	282.359	382.955	225.367	357.738	230.53	450.742	58.0391	122.359	84.3287	32.93
Total budget of measures addressing each SDG as % of total budget of draft RRP (1.2 billion Euros of priority A measures)	0.0581194	0.0736734	0.173552	0.102372	0.0719152	0.075518	0.23546	0.227497	0.308548	0.181579	0.28823	0.185739	0.363164	0.0467622	0.098585	0.0679438	0.0265318

## Sheet: Sheet2_with_weights
	SDG 1	SDG 2	SDG 3	SDG 4	SDG 5	SDG 6	SDG 7	SDG 8	SDG 9	SDG 10	SDG 11	SDG 12	SDG 13	SDG 14	SDG 15	SDG 16	SDG 17
	Goal 1-No Poverty	Goal 2-Zero Hunger	Goal 3-Good Health & Well Being	Goal 4-Quality Education	Goal 5-Gender Equality	Goal 6-Clean Water & Sanitation	Goal 7-Affordable & Clean Energy	Goal 8-Decent Work & Economic Growth	Goal 9-Industry, Innovation & Infrastructure	Goal 10-Reduced Inequalities	Goal 11-Sustainable Cities & Communities	Goal 12-Responsible Consumption & Production	Goal 13-Climate Action	Goal 14-Life Below Water	Goal 15-Life On Land	Goal 16-Peace Justice & Strong Institutions	Goal 17-Partnerships for the Goals
Total score by SDG	19	18	60	38	23	24	47	84	145	38	62	58	80	9	36	96	21
No. of measures addressing each SDG as % of all measures
Total budget of measures addressing each SDG (mio Euros)	231.423	153.52	599.274	355.912	268.639	223.989	861.727	769.233	1082.01	452.758	851.787	669.361	1332.47	101.118	295.078	264.086	426.792
Total budget of measures addressing each SDG as % of total budget of draft RRP (1.2 billion Euros of priority A measures)

## Sheet: Transformations_with_weights
	Transformation 1 - Education & Inequality	Transformation 2 - Health & Well-being	Transformation 3 - Decarbonisation & Sustainable Industry	Transformation 4 - Sustainable Food, Land, Water	Transformation 5 - Sustainable Cities & Communities	Transformation 6 - Digitalization
	Education, Gender, Inequality	Health, Wellbeing, Demography	Energy Decarbonisation & Sustainable Industry	Sustainable Food, Land, Water, Oceans	Sustainable Cities and Communities	Digital Revolution for Sustainable Development
Total score by SDG	84	34	91	51	64	81
No. of measures addressing each SDG as % of all measures
Total budget of measures addressing each SDG (mio Euros)	801.748	263.284	1339.95	415.34	920.334	709.59
Total budget of measures addressing each SDG as % of total budget of draft RRP (1.2 billion Euros of priority A measures)

## Sheet: RRP - SDGs Charts
SDGs	Count	% of total reforms & investments (134 items)	Cost (in millions)	% of cost pool (€1.2 billions)
Goal 1-No Poverty	7	0.0522388	72.1351	0.0581194
Goal 2-Zero Hunger	8	0.0597015	91.44	0.0736734
Goal 3-Good Health & Well Being	22	0.164179	215.405	0.173552
Goal 4-Quality Education	15	0.11194	127.06	0.102372
Goal 5-Gender Equality	8	0.0597015	89.2578	0.0719152
Goal 6-Clean Water & Sanitation	9	0.0671642	93.7295	0.075518
Goal 7-Affordable & Clean Energy	16	0.119403	292.242	0.23546
Goal 8-Decent Work & Economic Growth	29	0.216418	282.359	0.227497
Goal 9-Industry, Innovation & Infrastructure	53	0.395522	382.955	0.308548
Goal 10-Reduced Inequalities	18	0.134328	225.367	0.181579
Goal 11-Sustainable Cities & Communities	30	0.223881	357.738	0.28823
Goal 12-Responsible Consumption & Production	22	0.164179	230.53	0.185739
Goal 13-Climate Action	29	0.216418	450.742	0.363164
Goal 14-Life Below Water	4	0.0298507	58.0391	0.0467622
Goal 15-Life On Land	15	0.11194	122.359	0.098585
Goal 16-Peace Justice & Strong Institutions	33	0.246269	84.3287	0.0679438
Goal 17-Partnerships for the Goals	3	0.0223881	32.93	0.0265318
